# Supplementary material
Source: Springer Nature journal article supplement (https://www.springermedizin.de/resource/supplementary/12879_2008_885_MOESM1_ESM.pdf/9449566)

Thessaloniki  
650 children  
18.77% carriage rate  
7.38% PG-R

Alexandroupolis  
102 children  
33.33% carriage rate  
8.82% PG-R

Ioannina  
59 children  
44.07% carriage rate  
7.69% PG-R

Halkida, Evia  
271 children  
50.92% carriage rate  
15.22% PG-R

Nafplio-Tripoli-  
Sparti, Peloponnese  
426 children  
23.71% carriage rate  
13.86% PG-R

Athens  
932 children  
29.29% carriage rate  
15.75% PG-R

Heraklion Crete  
96 children  
54.17% carriage rate  
25% PG-R

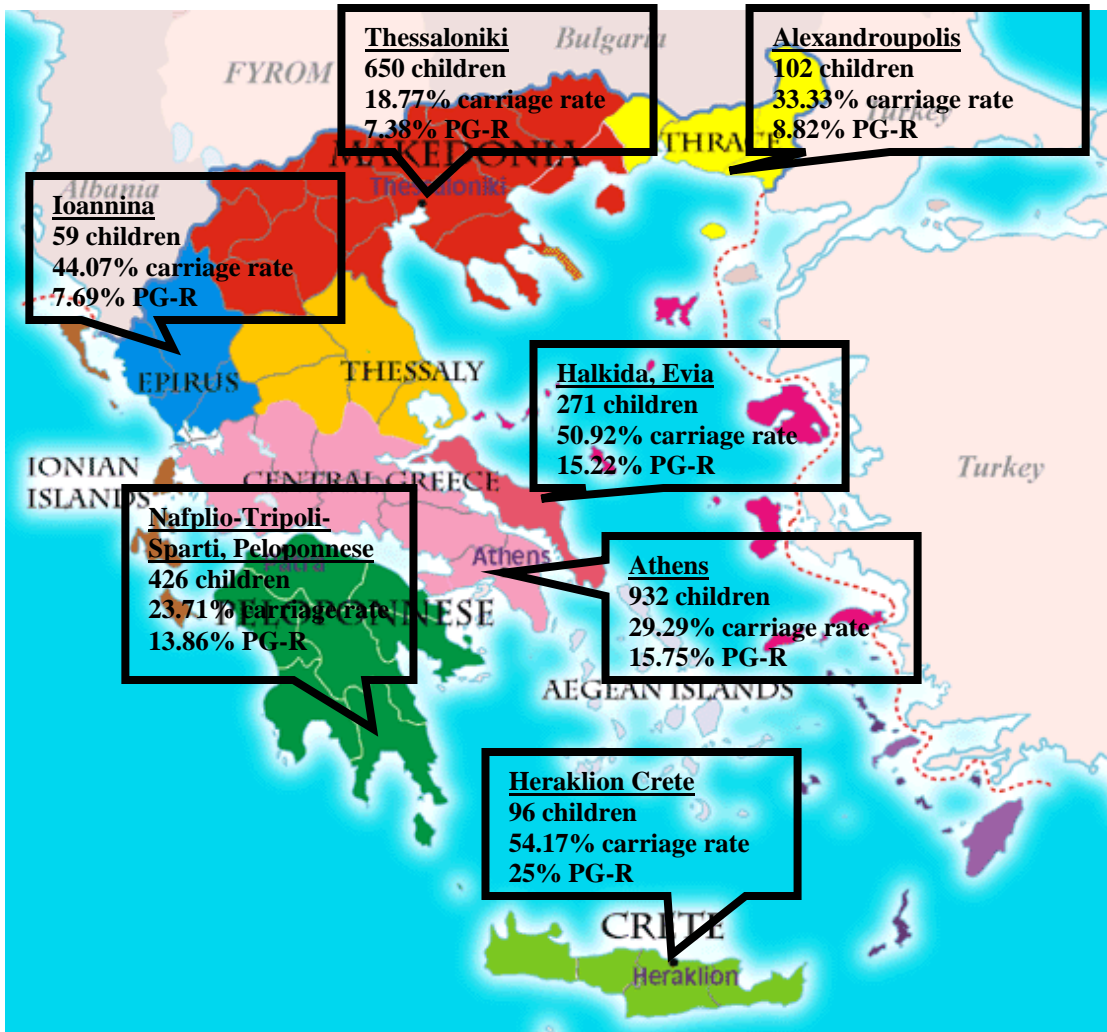

Supplement: MOESM1 [file 9449566]
